# Supplementary material for: Temporal interpolation of land surface fluxes derived from remotesensing – results with an Unmanned Aerial System
Source: Copernicus journal article supplement (doi:10.5194/hess-2019-490), 2019-10-14
Supplement: Supplementary file 1 [file hess-2019-490-supplement.pdf]

**Supplement to:** Temporal interpolation of land surface fluxes derived from remote sensing - results with  
an Unmanned Aerial System

Sheng Wang<sup>1</sup>, Monica Garcia<sup>1,2</sup>, Andreas Ibrom<sup>1</sup>, Peter Bauer-Gottwein<sup>2</sup>

<sup>1</sup>Department of Environmental Engineering, Technical University of Denmark, 2800 Kgs. Lyngby, Denmark

<sup>2</sup>International Research Institute for Climate and Society, The Earth Institute, Columbia University, Palisades, NY, USA

*Correspondence to:* Sheng Wang (shengwang12@gmail.com), Monica Garcia (mgarc@env.dtu.dk)

**Table S1.** Model parameters and equations. The extinction coefficients for PAR ( $k_{PAR}$ ) and for net radiation ( $k_{Rn}$ ) were equal to 0.5 and 0.6, respectively (Fisher et al., 2008; Impens and Lemeur, 1969; Ross, 1975). RH is the relative humidity.

| Parameter  | Description                                            | Equation                                                                                       | Reference              |
|------------|--------------------------------------------------------|------------------------------------------------------------------------------------------------|------------------------|
| $f_g$      | Green canopy fraction                                  | $f_g = f_{APAR}/f_{IPAR}$                                                                      | Fisher et al. (2008)   |
| $f_M$      | Plant moisture constraint                              | $f_M = f_{APAR}/\max(f_{APAR})$                                                                | Fisher et al. (2008)   |
| $f_{Ta}$   | Plant temperature constraint                           | $f_{Ta} = 1.1814 \cdot [1 + e^{0.3(-T_o - 10 + T_a)}]^{-1} [1 + e^{0.2(T_o - 10 - T_a)}]^{-1}$ | Potter et al. (1993)   |
| $f_{SM}$   | SM constraint                                          | $f_{SM} = \theta_e$                                                                            | Fisher et al. (2008)   |
| $f_{VPD}$  | Vapor pressure deficit constraint                      | $f_{VPD} = 1/(1 + VPD/D_0)$                                                                    | Lohammar et al. (1980) |
| PARc       | PAR intercepted by the canopy                          | $PARc = PAR - PARs$                                                                            | Ruimy et al. (1999)    |
| PARs       | PAR for the soil                                       | $PARs = PAR \cdot e^{-k_{PAR} \cdot LAI}$                                                      | Ruimy et al. (1999)    |
| Rnc        | Net radiation for the canopy                           | $Rnc = Rn - Rns$                                                                               | Fisher et al. (2008)   |
| Rns        | Net radiation for the soil                             | $Rns = Rn \cdot e^{-k_{Rn} \cdot LAI}$                                                         | Fisher et al. (2008)   |
| LAI        | Leaf area index                                        | $LAI = -\ln(1 - f_{IPAR})/k_{PAR}$                                                             | Ruimy et al. (1999)    |
| SAVI       | Soil adjusted vegetation index                         | $SAVI = 0.45 NDVI + 0.132$                                                                     | Huete (1988)           |
| $f_{APAR}$ | Fraction of PAR absorbed by green vegetation cover     | $f_{APAR} = 1.4 SAVI - 0.05$                                                                   | Fisher et al. (2008)   |
| $f_{IPAR}$ | Fraction of PAR intercepted by total vegetation cover. | $f_{IPAR} = 1.0 NDVI - 0.05$                                                                   | Fisher et al. (2008)   |
| $T_o$      | Optimum plant growth temperature                       | $T_a$ at $\max\{PAR \cdot f_{APAR} \cdot T_a/VPD\}$<br>16.51 °C for this study                 | Fisher et al. (2008)   |
| $D_0$      | Empirical coefficient for VPD                          | 15 hPa                                                                                         | Leuning et al. (1995)  |

**Table S2.** Information of model inputs to run SVEN at half hour time steps

| Input     | Description                            | Unit              |
|-----------|----------------------------------------|-------------------|
| $SW_{in}$ | Incoming shortwave radiation           | $W \cdot m^{-2}$  |
| $LW_{in}$ | Incoming longwave radiation            | $W \cdot m^{-2}$  |
| $T_a$     | Air temperature                        | $^{\circ}C$       |
| RH        | Relative air humidity                  | %                 |
| WS        | Wind speed                             | $m \cdot s^{-1}$  |
| $P_s$     | Air pressure                           | Pa                |
| P         | Precipitation                          | $mm \cdot h^{-1}$ |
| z         | Canopy height                          | m                 |
| NDVI      | Normalized Difference Vegetation Index | \                 |

**Table S3.** Information on model initial conditions

| Initial conditions | Description                   | Unit |
|--------------------|-------------------------------|------|
| $CWS_{in}$         | Initial canopy water storage  | m    |
| $SWS_{in}$         | Initial soil water storage    | m    |
| $T_{s0}$           | Initial surface temperature   | °C   |
| $T_{d0}$           | Initial deep soil temperature | °C   |

**Table S4.** Information on model outputs

| Output            | Description                  | Unit                                                        |
|-------------------|------------------------------|-------------------------------------------------------------|
| $T_s$             | Surface temperature          | $^{\circ}\text{C}$                                          |
| $T_d$             | Deep soil temperature        | $^{\circ}\text{C}$                                          |
| $LW_{\text{out}}$ | Outgoing longwave radiation  | $\text{W}\cdot\text{m}^{-2}$                                |
| $SW_{\text{out}}$ | Outgoing shortwave radiation | $\text{W}\cdot\text{m}^{-2}$                                |
| $R_n$             | Net radiation                | $\text{W}\cdot\text{m}^{-2}$                                |
| $G$               | Ground heat flux             | $\text{W}\cdot\text{m}^{-2}$                                |
| $LE$              | Latent heat flux             | $\text{W}\cdot\text{m}^{-2}$                                |
| $H$               | Sensible heat flux           | $\text{W}\cdot\text{m}^{-2}$                                |
| $GPP$             | Gross Primary Productivity   | $\text{g}\cdot\text{C}\cdot\text{m}^{-2}\cdot\text{d}^{-1}$ |
| $CWS$             | Canopy Water Storage         | $\text{m}$                                                  |
| $\theta$          | Volumetric SM                | $\text{m}^3\cdot\text{m}^{-3}$                              |
| $R$               | Surface runoff               | $\text{m}\cdot\text{s}^{-1}$                                |
| $Q_{\text{per}}$  | Percolation                  | $\text{m}\cdot\text{s}^{-1}$                                |

**Table S5.** Parameter values of the Mualem model for different soil texture classes (Carsel and Parrish, 1988).  $\theta_r$  is the residual soil moisture ( $\text{m}^3\cdot\text{m}^{-3}$ ).  $\theta_s$  is the saturated soil moisture ( $\text{m}^3\cdot\text{m}^{-3}$ ).  $n$  is the fitting parameter of the Mualem model.  $K_s$  is the infiltration rate for the saturated soil ( $\text{mm}\cdot\text{h}^{-1}$ ). Values in the brackets are standard deviations.

| Texture class   | $\theta_r$    | $\theta_s$  | $n$         | $K_s$          |
|-----------------|---------------|-------------|-------------|----------------|
| Sand            | 0.045 (0.010) | 0.43 (0.06) | 2.68 (0.29) | 297.00 (156.0) |
| Loamy sand      | 0.057 (0.015) | 0.41 (0.09) | 2.28 (0.27) | 145.90 (113.6) |
| Sandy loam      | 0.065 (0.017) | 0.41 (0.09) | 1.89 (0.17) | 44.20 (56.3)   |
| Loam            | 0.078 (0.013) | 0.43 (0.10) | 1.56 (0.11) | 10.40 (18.2)   |
| Silt            | 0.034 (0.010) | 0.46 (0.11) | 1.37 (0.05) | 2.50 (3.3)     |
| Silt loam       | 0.067 (0.015) | 0.45 (0.08) | 1.41 (0.12) | 4.50 (12.3)    |
| Sandy clay loam | 0.100 (0.006) | 0.39 (0.07) | 1.48 (0.13) | 13.10 (27.4)   |
| Clay loam       | 0.095 (0.010) | 0.41 (0.09) | 1.31 (0.09) | 2.60 (7.0)     |
| Silty clay loam | 0.089 (0.009) | 0.43 (0.07) | 1.23 (0.06) | 0.70 (1.9)     |
| Sandy clay      | 0.100 (0.013) | 0.38 (0.05) | 1.23 (0.10) | 1.20 (2.8)     |
| Silty clay      | 0.070 (0.023) | 0.36 (0.07) | 1.09 (0.06) | 0.20 (1.1)     |
| Clay            | 0.068 (0.034) | 0.38 (0.09) | 1.09 (0.09) | 2.00 (4.2)     |

## Reference

- Carsel, R. F. and Parrish, R. S.: Developing joint probability distributions of soil water retention characteristics, *Water Resour. Res.*, 24(5), 755–769, doi:10.1029/WR024i005p00755, 1988.
- Fisher, J. B., Tu, K. P. and Baldocchi, D. D.: Global estimates of the land-atmosphere water flux based on monthly AVHRR and ISLSCP-II data, validated at 16 FLUXNET sites, *Remote Sens. Environ.*, 112(3), 901–919, doi:10.1016/j.rse.2007.06.025, 2008.
- Huete, A. R.: A soil-adjusted vegetation index (SAVI), *Remote Sens. Environ.*, 25(3), 295–309, doi:10.1016/0034-4257(88)90106-X, 1988.
- Impens, I. and Lemeur, R.: Extinction of net radiation in different crop canopies, *Arch. für Meteorol. Geophys. und Bioklimatologie Ser. B*, 17(4), 403–412, doi:10.1007/BF02243377, 1969.
- LEUNING, R.: A critical appraisal of a combined stomatal-photosynthesis model for C3 plants, *Plant. Cell Environ.*, 18(4), 339–355, doi:10.1111/j.1365-3040.1995.tb00370.x, 1995.
- Lohammar, T., Larsson, S., Linder, S. and Falk, S. O.: FAST: Simulation Models of Gaseous Exchange in Scots Pine, *Ecol. Bull.*, (32), 505–523, doi:10.2307/20112831, 1980.
- Potter, C. S., Randerson, J. T., Field, C. B., Matson, P. A., Vitousek, P. M., Mooney, H. A. and Klooster, S. A.: Terrestrial ecosystem production: A process model based on global satellite and surface data, *Global Biogeochem. Cycles*, 7(4), 811–841, doi:10.1029/93GB02725, 1993.
- Ross, J.: Radiative transfer in plant communities, *Veg. Atmos.*, 13–55, 1975.
- Ruimy, A., Kergoat, L. and Bondeau, A.: Comparing global models of terrestrial net primary productivity (NPP): Analysis of differences in light absorption and light-use efficiency, *Glob. Chang. Biol.*, 5(SUPPL. 1), 56–64, doi:10.1046/j.1365-2486.1999.00007.x, 1999.
